# Supplementary material for: Investigation of prototypal MOFs consisting of polyhedral cages with accessible Lewis-acid sites for quinoline synthesis
Source: Royal Society of Chemistry journal article supplement (doi:10.1039/c4cc09410g), 2015-01-01
Supplement: c4cc09410g1.pdf [file c4cc09410g1.pdf]

**Electronic Supplementary Information**

**Investigation of Prototypal MOFs Consisting of Polyhedral Cages with Accessible  
Lewis-Acid Sites for Quinoline Synthesis**

**Wen-Yang Gao,<sup>a</sup> Kunyue Leng,<sup>b</sup> Lindsay Cash,<sup>a</sup> Matthew Chrzanowski,<sup>a</sup> Chavis A.  
Stackhouse,<sup>a</sup> Yinyong Sun<sup>b</sup> and Shengqian Ma<sup>\*,a</sup>**

<sup>a</sup> *Department of Chemistry, University of South Florida, 4202 East Fowler Avenue, Tampa,  
Florida, 33620, United States, Fax: +1 813-974-3203; Tel: +1 813-974-5217; E-mail:  
[sqma@usf.edu](mailto:sqma@usf.edu)*

<sup>b</sup> *School of Chemical Engineering and Technology, Harbin Institute of Technology, Harbin,  
150001, China*

Commercially available reagents were purchased in high purity from Fisher Scientific or Sigma Aldrich and used without further purification. The powder X-ray diffraction was performed on a Bruker D8 Advance,  $\text{CuK}\alpha$ ,  $\lambda = 1.54178 \text{ \AA}$  (40 kV, 40 mA). Temperature-programmed desorption of  $\text{NH}_3$  ( $\text{NH}_3$ -TPD) was carried out on FINESORB-3010 equipped with a thermal conductivity detector. The samples were first outgassed under 373 K for 12 h before the measurement. After cooling to 298 K, the samples were saturated in an  $\text{NH}_3$  stream (5% in Ar) for 30 minutes and consequently treated in Ar (30 mL/min) for 1 h for removing physisorbed  $\text{NH}_3$ . Finally, the TPD profile was determined by increasing temperature from 298 K to 523 K with ramping rate of 10 K/min while recording  $\text{NH}_3$  desorption with a thermal conductivity detector.

### **MOF Synthesis**

HKUST-1,<sup>1</sup> MOF-505<sup>2</sup> and MMCF-2<sup>3</sup> were prepared using the procedures reported in the literature. The phase purity was confirmed by the powder X-ray diffraction, illustrated in Fig. S1-S3.

### **Catalysis experiments**

The Friedlander condensation reaction was conducted in a 5 mL round bottom flask equipped with a condenser and a magnetic stirrer at a stirring rate of 120 r/min. In a typical procedure, 2-aminoaryl ketones (1mmol), ketone compounds (2 mL) were added into the flask with loading catalyst (0.01mmol on basis of  $\text{Cu}_2(\text{CO}_2)_4$  unit, MOF-505, 6.7 mg; HKUST-1, 6.3 mg and MMCF-2, 17.1 mg) and the resulting mixture was stirred at 358 K for 24 hours. The products were monitored by GC-MS (HP-5MS column, 5% phenyl methyl siloxane,  $30 \text{ m} \times 0.25 \text{ mm} \times 0.25 \text{ }\mu\text{m}$ ; injector temperature 250 °C). All products were identified by the comparison of GC retention times and mass spectra with those of the authentic samples.

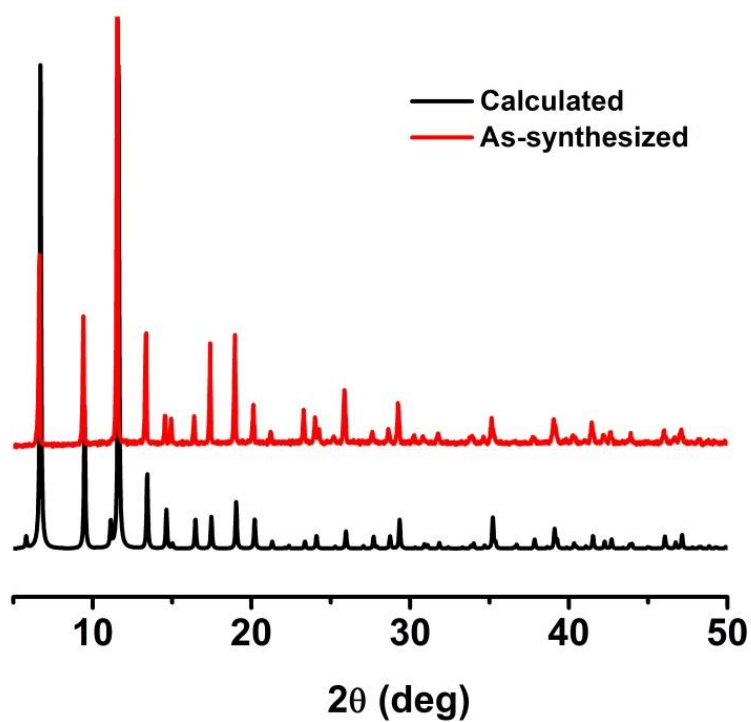

**Fig. S1.** Powder X-ray diffraction patterns of HKUST-1.

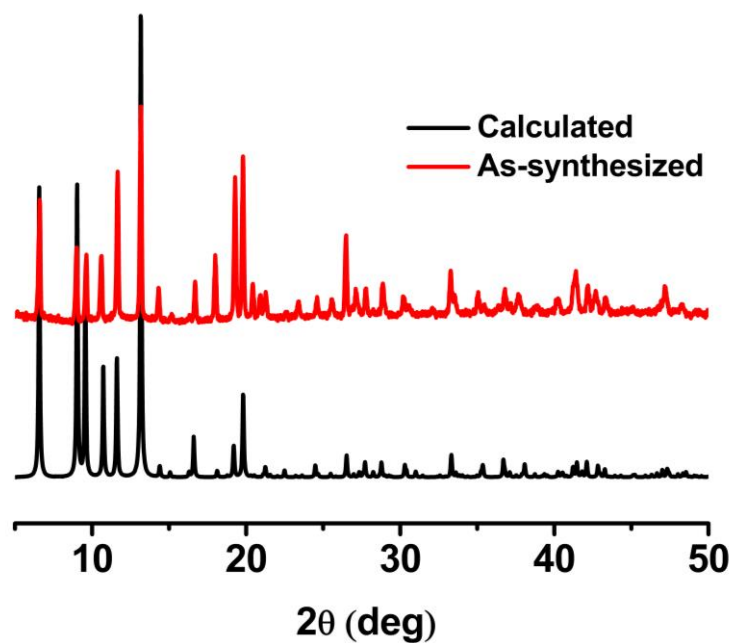

**Fig. S2.** Powder X-ray diffraction patterns of MOF-505.

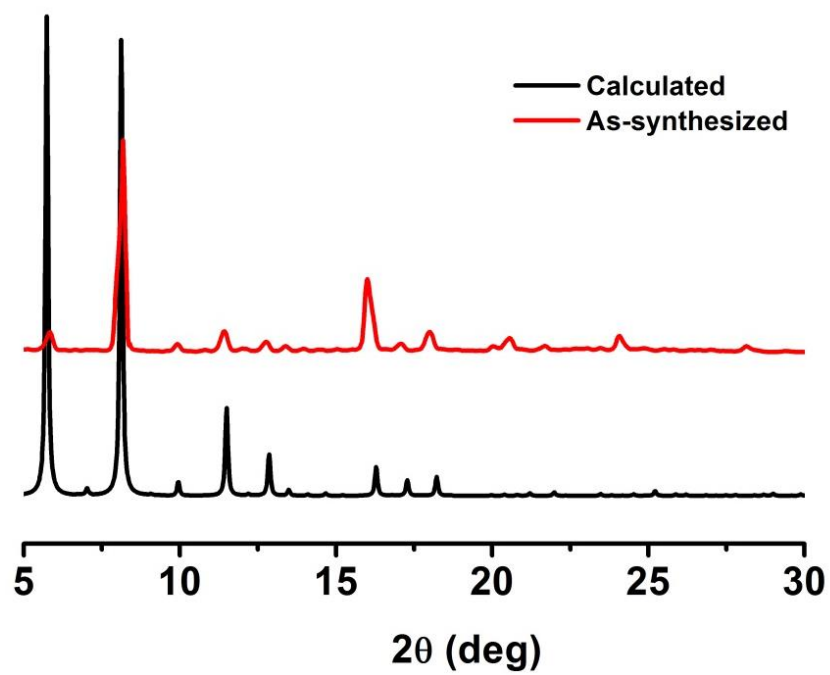

**Fig. S3.** Powder X-ray diffraction patterns of MMCF-2.

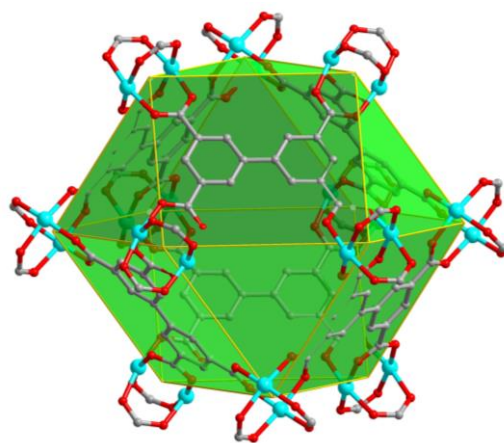

**Fig. S4.** The cuboctahedral cage in MOF-505.

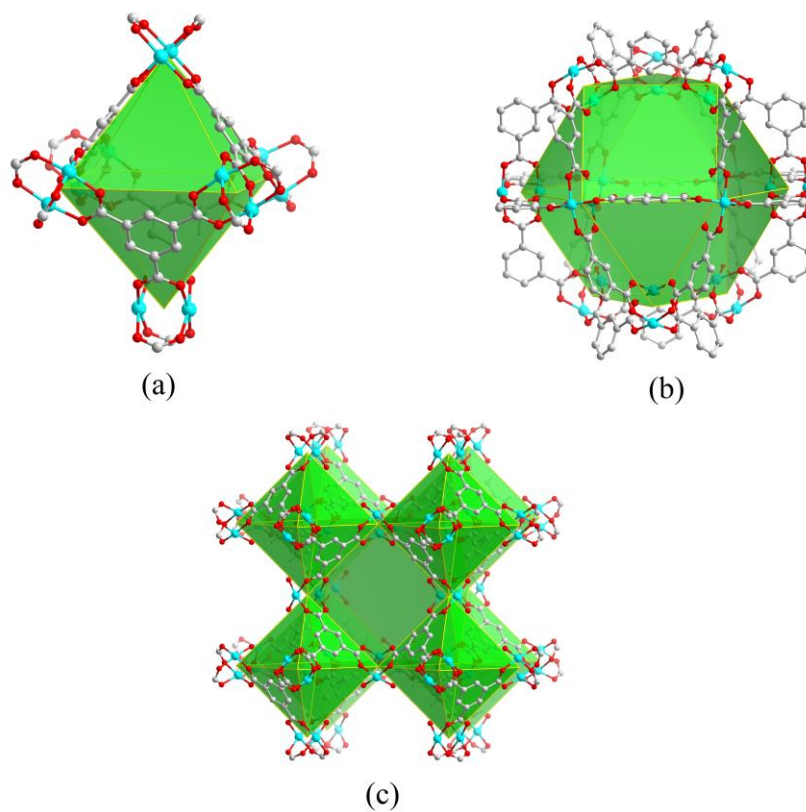

**Fig. S5.** Pictures of HKUST-1 (a) octahedral cage; (b) cuboctahedral cage; (c) close packing of polyhedral cages.

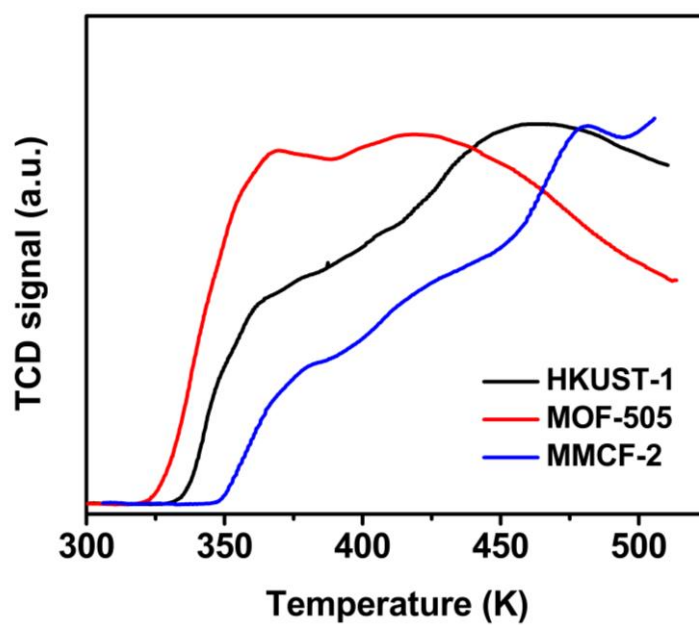

**Fig. S6.** NH<sub>3</sub>-TPD profiles of HKUST-1, MOF-505 and MMCF-2 catalysts.

## References.

1. Liu, J.; Culp, J. T.; Natesakhawat, S.; Bockrath, B. C.; Zande, B.; Sankar, S. G.; Garberoglio, G.; Johnson, J. K. *J. Phys. Chem. C*, **2007**, *111*, 9305.
2. Chen, B.; Ockwig, N. W.; Millward, A. R.; Contreras, D. S.; Yaghi, O. M. *Angew. Chem. Int. Ed.*, **2005**, *44*, 4745.
3. Gao, W.-Y.; Chen, Y.; Niu, Y.; Williams, K.; Cash, L.; Perez, P. J.; Wojtas, L.; Cai, J.; Chen, Y.-S.; Ma, S. *Angew. Chem. Int. Ed.*, **2014**, *53*, 2615-2619.
